# Supplementary material for: Post-transcriptional gene regulation by an Hfq-independent small RNA in Caulobacter crescentus
Source: PubMed Central journal article supplement (PMC6237742; doi:10.1093/nar/gky765), 2018-08-27
Supplement: gky765_supplemental_files.pdf [file gky765_supplemental_files.pdf]

## **Supplemental Information**

### **Post-transcriptional gene regulation by an Hfq-independent small RNA in *Caulobacter crescentus***

Kathrin S. Fröhlich, Konrad U. Förstner, and Zemer Gitai

This Supplement contains:

**Supplementary Figures S1-S9**

**Supplementary Tables S1-S4**

**Supplementary References**

## Supplementary Figure S1

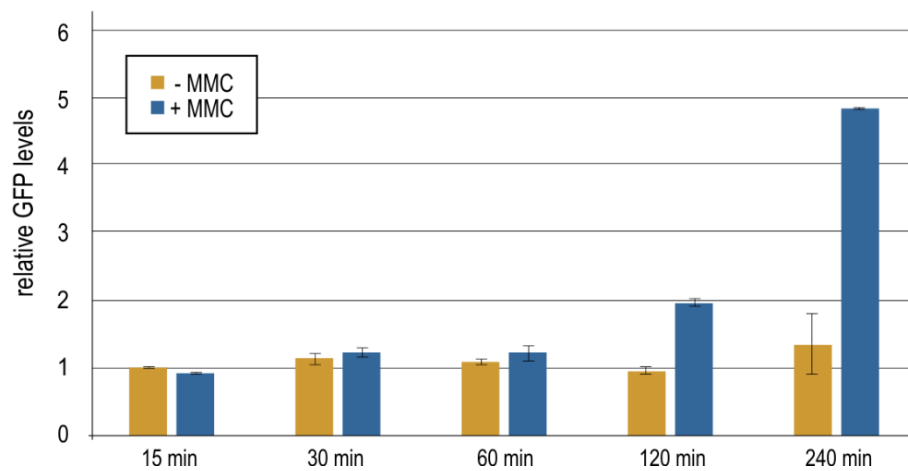

GFP fluorescence of *C. crescentus* carrying the reporter plasmid pPbapE::gfp (pKF310-3) at different time-points after addition of the DNA damaging agent MMC to cells grown in PYE ( $OD_{660}$  of 0.4 at  $t=0$  min; blue bars). An untreated culture aliquot was sampled in parallel, and served as negative control (yellow bars). Fluorescence levels were normalized to a culture sample collected prior to MMC addition. Error bars indicate the standard deviation calculated of three biological replicates

## Supplementary Figure S2

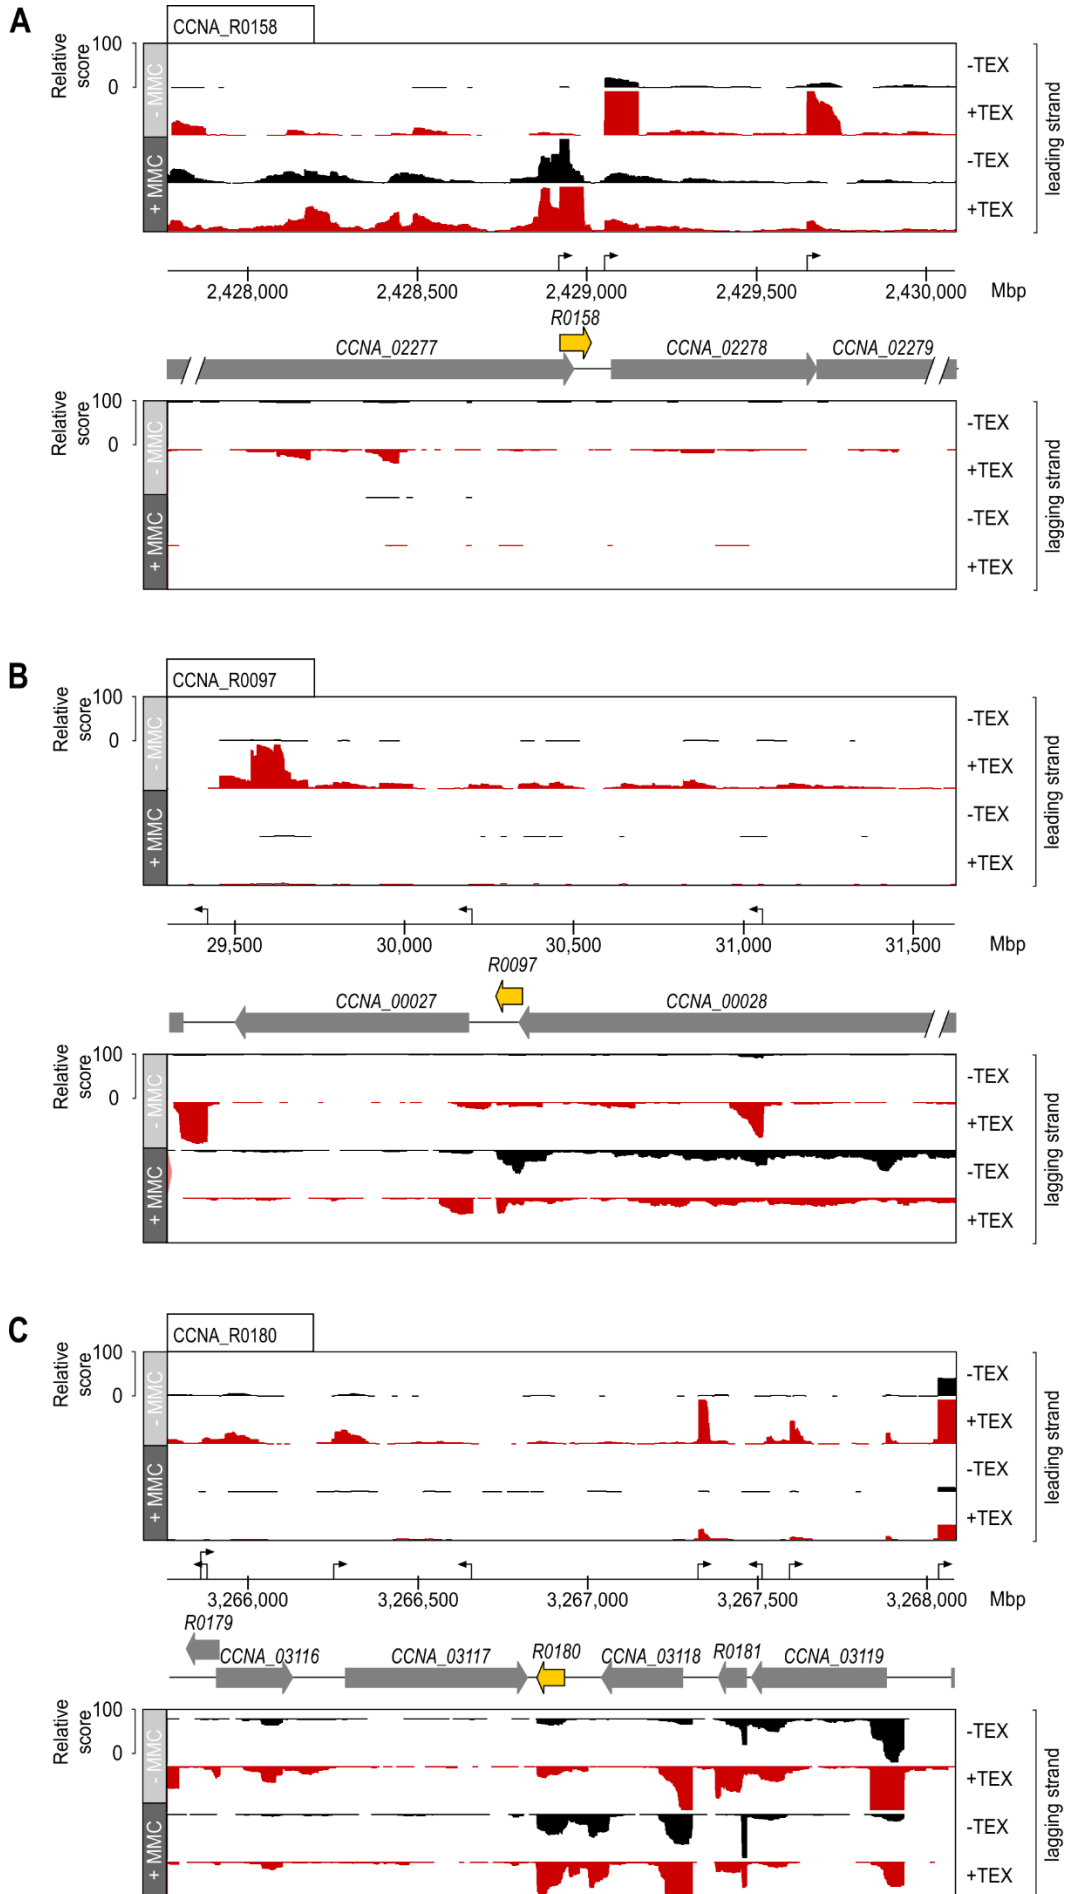

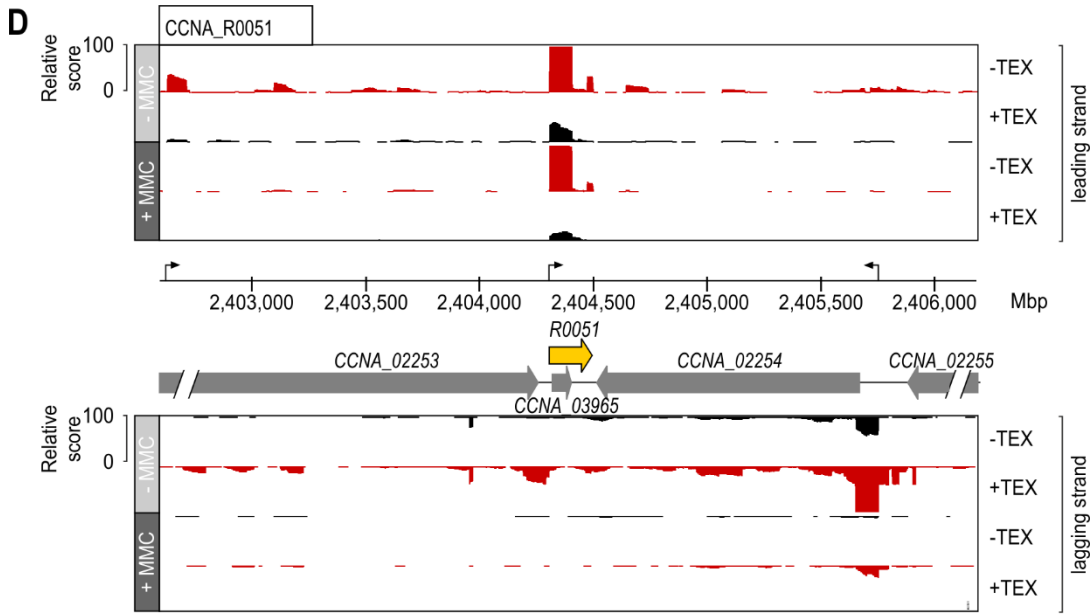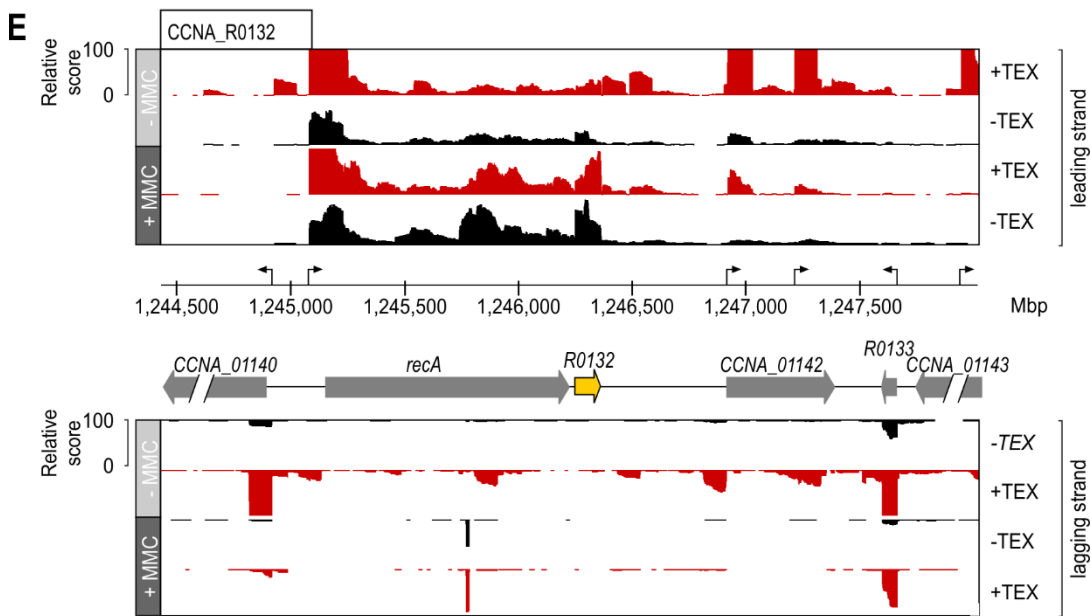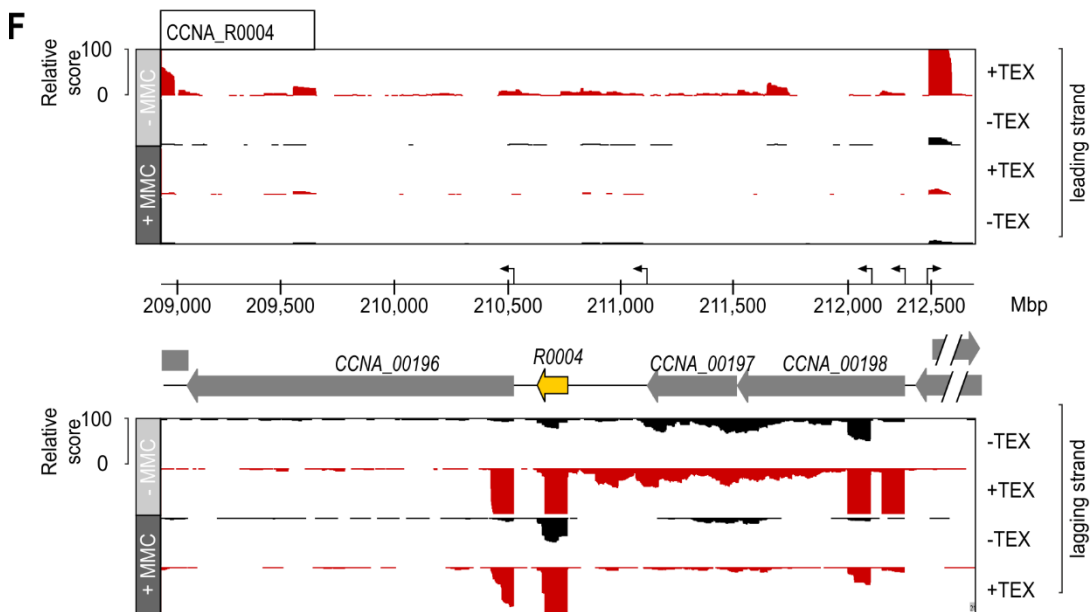

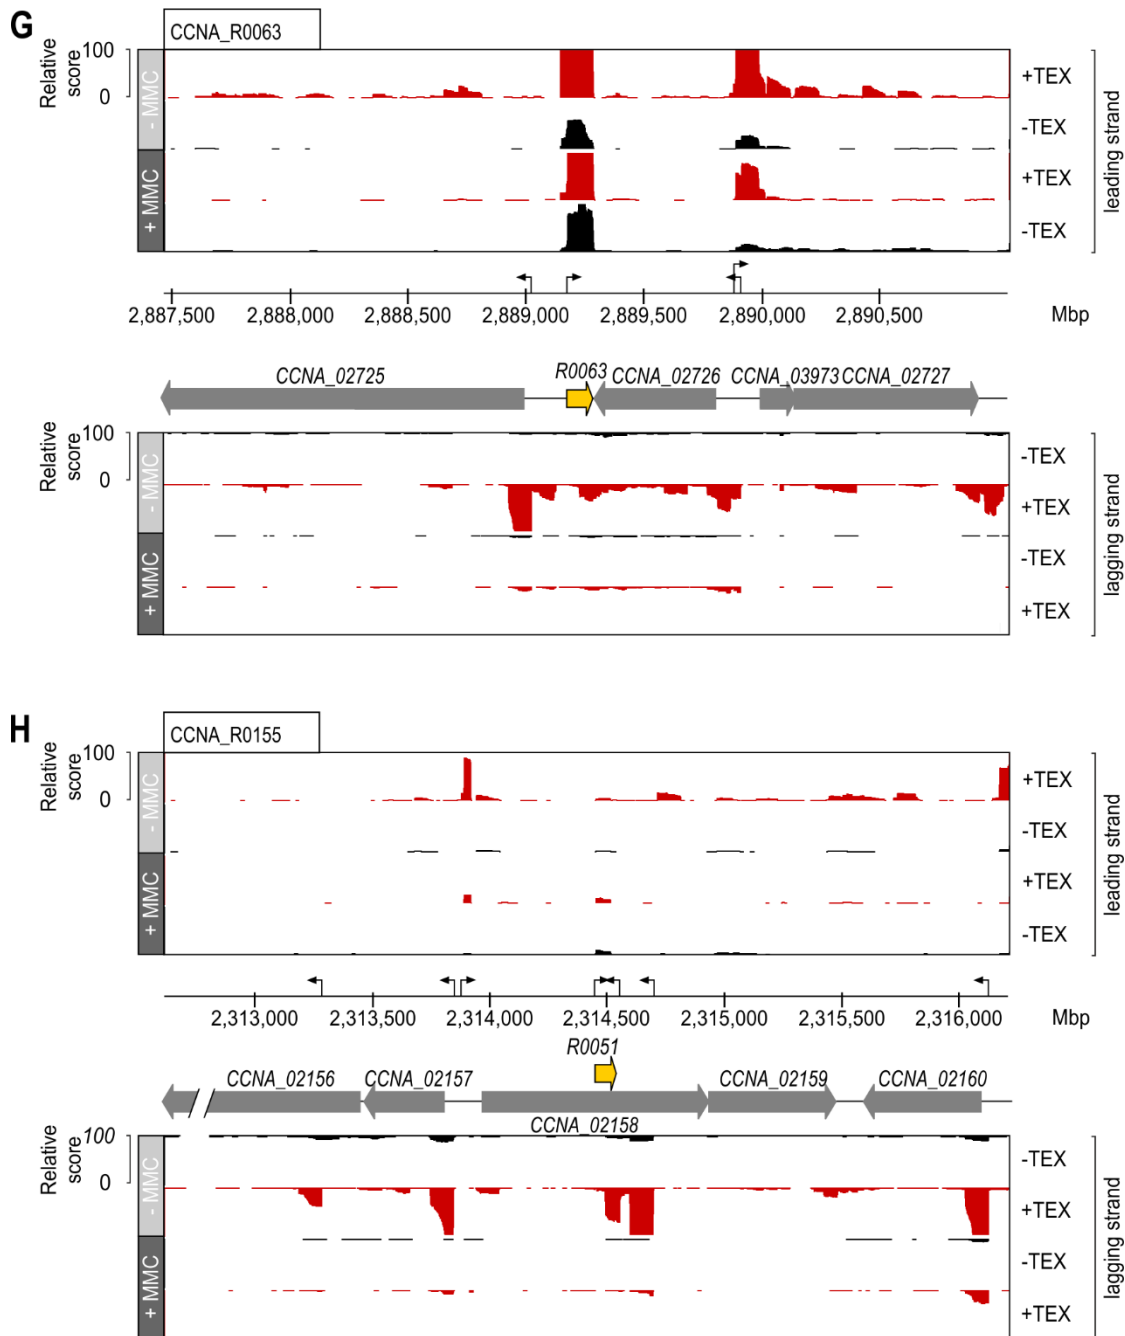

Global transcriptome analysis of the *C. crescentus* response to DNA damage. RNA was collected from *C. crescentus* grown in PYE prior to ( $OD_{660}$  of 0.4) or 4h after treatment with the DNA-damaging agent MMC, and analyzed by dRNA-seq. cDNA reads of -TEX (black) and +TEX (red) libraries were mapped to the *C. crescentus* NA1000 genome, and genomic loci encoding candidate sRNAs CCNA\_R0158 (A), CCNA\_R0097 (B), CCNA\_R0180 (C), CCNA\_R0051 (D), CCNA\_R0132 (E), CCNA\_R0004 (F), CCNA\_R0063 (G), and CCNA\_R0155 (H) are shown. All libraries were adjusted to same scale. The genome coordinates are indicated in the centre. sRNA genes are indicated by yellow arrows, flanking genes are indicated by gray arrows. Transcriptional start sites are marked by black arrows.





## Supplementary Figure S4

CCNA\_00157  
... TACAAGCTGGGCTGAaatctcgaagaacagcggattcttaattcgcacatccatgaa  
agggccccgcagcgatttcgccatggtctcgccacagagtggcggcgagcttggccgc  
▶ *chvR*  
**GGCGGGGCCTACATGTTCGCGCAAGTCTCCGGAGGGCCATTCCGAGGCGGGGCCGCTC**  
**CAGCGTCCTCATTGGAGCGGGCGTCT**cggcccgccctagccccggggccgacaccgct  
▶ *recF*  
taagaacgcccgc**ATGGCGTCGGCCGCACTGCTTTCCCTGACCCTGGCGGACTTT...**

Location of *chvR* (originally annotated as CCNA\_R0100) in the genome of *C. crescentus* NA1000. Transcriptional start sites are indicated by arrows, and have been confirmed by transcriptomic data (this study and (1)). The flanking genes CCNA\_00157 and *recF* are indicated in gray and yellow, respectively, and translational start and stop codons are underlined.



**Supplementary Figure S5**

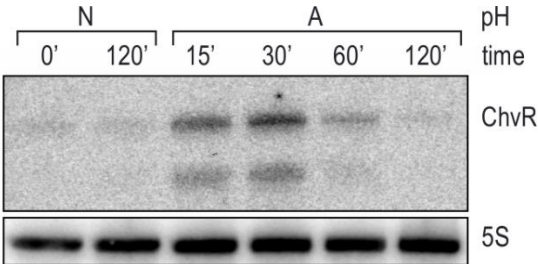

Expression of ChvR in acidified growth medium. *C. crescentus* was grown in PYE to mid-exponential phase when cultures were split, and growth was continued in PYE at either neutral (N; pH=7) or acidic pH (A; pH=5.5). RNA samples were collected at indicated time-points, and ChvR levels were determined by Northern blot analysis.

## Supplementary Figure S6

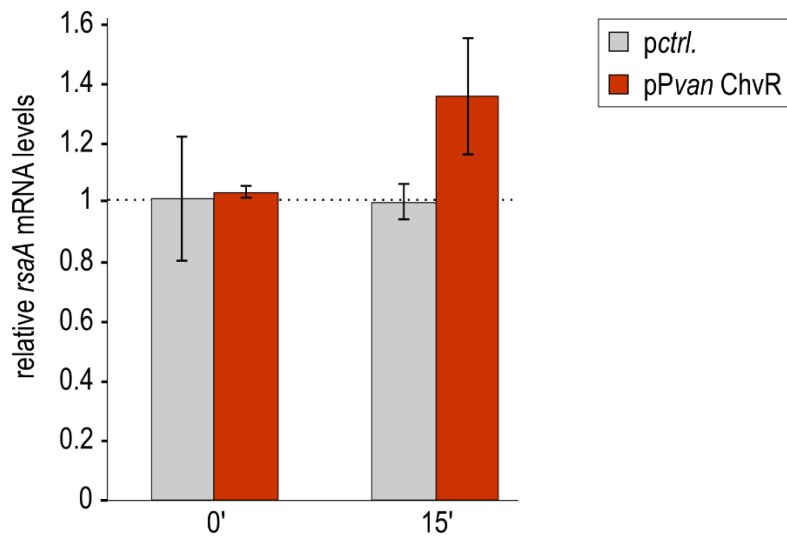

Expression of *rsaA* mRNA in the presence and absence of ChvR sRNA. *C. crescentus* carrying either control plasmid *pctrl.* (pBVMCS-6; gray bars), or pPvan ChvR (pKF382-1; red bars) were grown in M2G medium to mid-exponential phase (OD<sub>660</sub> of 0.6). RNA samples were collected prior to and 15 minutes after induction of ChvR expression by addition of vanillate. Abundance of *rsaA* mRNA was determined by qRT-PCR; error bars represent the standard deviation of two biological replicates.

## Supplementary Figure S7

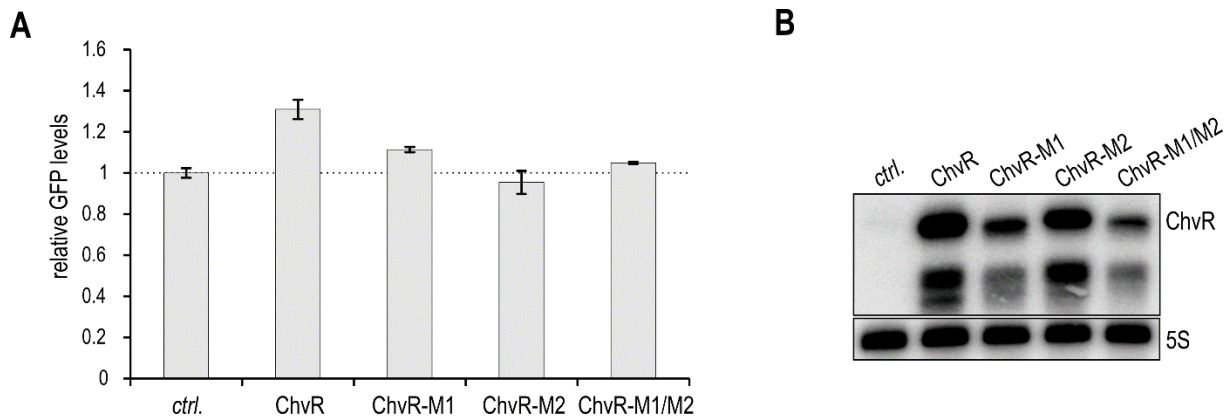

(A) Analysis of GFP production of *C. crescentus*  $\Delta vanAB$  cells expressing fusion *rsaA::gfp* (pKF385-2) in combination with either a control vector (pBVMCS-6), or plasmids expressing ChvR (pKF382-1); ChvR-M1 (pKF395-1); ChvR-M2 (pKF414-1) or ChvR-M1/M2 (pKF418-1) from the inducible  $P_{van}$  promoter. Cells were grown overnight in PYE in the presence of vanillate. Error bars represent the standard deviation of three biological replicates. (B) Expression of ChvR variants was determined by Northern blot analysis of RNA samples collected from cells grown as described in (A). An oligo probe recognizing all sRNA versions (KFO-0512) was used for hybridization. 5S ribosomal RNA served as a loading control.

**Supplementary Figure S8**

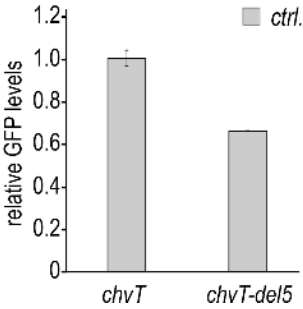

Analysis of GFP production of *C. crescentus*  $\Delta$ *vanAB* cells expressing fusion *chvT::gfp* (pKF386-1) or *chvT-del5::gfp* (pKF402-1) in combination with a control vector (pBVMCS-6). Cells were grown overnight in PYE in the presence of vanillate. Expression levels of the wild-type fusion were set to 1. Error bars represent the standard deviation of three biological replicates.

## Supplementary Figure S9

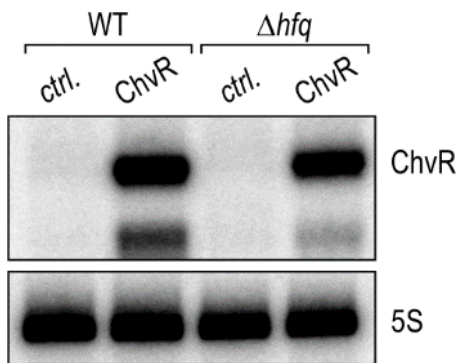

Expression of ChvR was determined by Northern blot analysis of RNA samples collected from *C. crescentus*  $\Delta vanAB$  (WT) or *C. crescentus*  $\Delta vanAB \Delta hfq$  ( $\Delta hfq$ ) cells expressing fusion *chvT::gfp* (pKF386) in combination with either a control vector (pBVMCS-6), or plasmids expressing ChvR (pKF382-1). 5S ribosomal RNA served as a loading control.

**Supplementary Table S1 - Genes upregulated at least 3-fold upon treatment with MMC**

| Locus ID<br>NA1000 | Locus ID<br>CB15 | annotation                                                                | SOS<br>box | log2<br>FC | Adj p-<br>value |
|--------------------|------------------|---------------------------------------------------------------------------|------------|------------|-----------------|
| CCNA_02277         | CC_2194          | TonB-dependent outer membrane channel                                     | no         | 6,22       | 2,80E-19        |
| CCNA_R0158         | -                | small non-coding RNA                                                      | no         | 6,08       | 4,03E-16        |
| CCNA_02275         | -                | ABC transporter, periplasmic component                                    | no         | 5,62       | 4,79E-15        |
| CCNA_03940         | -                | hypothetical protein                                                      | no         | 5,58       | 3,96E-14        |
| CCNA_03904         | -                | hypothetical protein                                                      | no         | 5,52       | 1,79E-14        |
| CCNA_02274         | CC_2192          | EF-Hand domain protein                                                    | no         | 5,32       | 2,63E-12        |
| CCNA_01476         | CC_1410          | CRP-family transcription regulator FtrB                                   | no         | 5,03       | 3,54E-14        |
| CCNA_00028         | CC_0028          | TonB-dependent receptor                                                   | no         | 4,83       | 3,80E-13        |
| CCNA_00619         | CC_0583          | succinylarginine dihydrolase                                              | no         | 4,79       | 2,44E-12        |
| CCNA_00754         | CC_0717          | Nodulin-21 / CCC1-related protein                                         | no         | 4,78       | 1,40E-11        |
| CCNA_00617         | CC_0581          | arginine N-succinyltransferase, beta chain                                | no         | 4,77       | 3,30E-13        |
| CCNA_00618         | CC_0582          | succinylglutamic semialdehyde dehydrogenase                               | no         | 4,75       | 9,63E-14        |
| CCNA_03826         | CC_3711          | conserved hypothetical protein                                            | no         | 4,59       | 2,44E-12        |
| CCNA_03065         | CC_2970          | cytochrome c family protein                                               | no         | 4,56       | 1,15E-07        |
| CCNA_01466         | CC_1400          | hypothetical protein                                                      | no         | 4,53       | 8,60E-07        |
| CCNA_02452         | CC_2367          | hypothetical protein                                                      | no         | 4,52       | 1,09E-10        |
| CCNA_01467         | CC_1401          | cytochrome cbb3 oxidase subunit I ccoN                                    | no         | 4,50       | 1,12E-09        |
| CCNA_02604         | CC_2519          | host cell attachment protein                                              | no         | 4,49       | 3,61E-07        |
| CCNA_00154         | CC_0155          | conserved hypothetical membrane protein                                   | no         | 4,46       | 5,97E-07        |
| CCNA_00620         | CC_0584          | acetylornithine aminotransferase/succinyldiaminopimelate aminotransferase | no         | 4,42       | 2,44E-12        |
| CCNA_R0097         | -                | small non-coding RNA                                                      | no         | 4,27       | 8,92E-07        |
| CCNA_02610         | CC_2526          | glyoxalase family protein                                                 | no         | 4,22       | 1,15E-07        |
| CCNA_00800         | CC_0762          | cytochrome bd-type quinol oxidase, subunit 1 cydA                         | no         | 4,20       | 8,70E-10        |
| CCNA_01477         | CC_1411          | oxygen-independent coproporphyrinogen-III oxidase hemN                    | no         | 4,18       | 3,61E-10        |
| CCNA_00789         | CC_0752          | hypoxia transcriptional regulator FixK                                    | no         | 4,18       | 7,68E-07        |
| CCNA_03933         | -                | hypothetical protein                                                      | no         | 4,15       | 1,46E-07        |
| CCNA_03932         | -                | hypothetical protein                                                      | no         | 4,10       | 1,84E-07        |
| CCNA_03825         | CC_3710          | hypothetical protein                                                      | no         | 4,09       | 3,59E-09        |
| CCNA_03155         | CC_3059          | PepSY-associated transmembrane protein                                    | no         | 4,03       | 2,60E-08        |
| CCNA_00279         | CC_0277          | NAD(P)H-quinone reductase                                                 | no         | 4,01       | 9,42E-09        |
| CCNA_00434         | CC_0425          | conserved membrane-spanning protein                                       | no         | 3,86       | 1,40E-05        |
| CCNA_01980         | CC_1903          | PEP phosphonmutase related enzyme                                         | no         | 3,81       | 1,17E-07        |
| CCNA_03400         | CC_3291          | conserved hypothetical protein                                            | no         | 3,78       | 4,32E-07        |
| CCNA_02418         | CC_2333          | uracil DNA glycosylase superfamily protein                                | yes        | 3,74       | 8,56E-07        |
| CCNA_02396         | CC_2311          | GST / metaxin-like protein                                                | no         | 3,73       | 1,46E-07        |
| CCNA_03318         | CC_3212          | DNA polymerase Y-family protein                                           | no         | 3,70       | 5,95E-05        |
| CCNA_00027         | CC_0027          | 2OG-Fe(II) oxygenase                                                      | no         | 3,67       | 2,99E-07        |
| CCNA_01391         | CC_1330          | radical SAM superfamily protein                                           | yes        | 3,65       | 2,84E-06        |
| CCNA_00799         | CC_0761          | ABC transporter, ATP-binding protein cydD                                 | no         | 3,64       | 9,47E-06        |
| CCNA_03022         | CC_2927          | PiuB-family transmembrane transporter                                     | no         | 3,55       | 1,87E-06        |
| CCNA_00748         | CC_0711          | ferrous iron transport protein A                                          | no         | 3,52       | 1,28E-06        |

|            |         |                                                              |     |      |          |
|------------|---------|--------------------------------------------------------------|-----|------|----------|
| CCNA_03159 | CC_3063 | sulfite reductase (NADPH) flavoprotein alpha-component       | no  | 3,52 | 3,82E-05 |
| CCNA_03157 | CC_3061 | conserved hypothetical protein                               | no  | 3,47 | 3,83E-04 |
| CCNA_00663 | CC_0627 | bacterial apoptosis endonuclease BapE                        | yes | 3,47 | 2,63E-05 |
| CCNA_01520 | CC_1453 | conserved hypothetical protein                               | no  | 3,40 | 1,45E-05 |
| CCNA_00749 | CC_0712 | ferrous iron transport protein B                             | no  | 3,40 | 8,56E-07 |
| CCNA_00433 | -       | type 1 capsular polysaccharide biosynthesis protein J        | no  | 3,40 | 8,66E-05 |
| CCNA_03118 | CC_3023 | hypothetical protein                                         | no  | 3,40 | 2,38E-04 |
| CCNA_00276 | CC_0274 | conserved hypothetical protein                               | no  | 3,37 | 1,74E-05 |
| CCNA_03840 | CC_3724 | succinyl-CoA:coenzyme A transferase                          | no  | 3,37 | 3,54E-05 |
| CCNA_02876 | -       | very short patch repair (Vsr) endonuclease                   | no  | 3,36 | 1,22E-05 |
| CCNA_01767 | CC_1696 | cytochrome C family protein                                  | no  | 3,34 | 2,80E-05 |
| CCNA_01475 | CC_1409 | OmpW family outer membrane protein                           | no  | 3,33 | 1,39E-04 |
| CCNA_02615 | CC_2532 | homogentisate 1,2-dioxygenase                                | no  | 3,28 | 1,41E-06 |
| CCNA_03158 | CC_3062 | iron-sulfur cluster assembly/repair protein ApbE             | no  | 3,28 | 4,12E-04 |
| CCNA_03466 | CC_3356 | ORF6N domain protein                                         | yes | 3,26 | 1,69E-04 |
| CCNA_03317 | CC_3211 | DNA polymerase III alpha subunit                             | no  | 3,23 | 4,00E-05 |
| CCNA_00798 | CC_0760 | ABC transporter, ATP-binding protein cydC                    | no  | 3,21 | 1,11E-03 |
| CCNA_02603 | CC_2518 | conserved hypothetical protein                               | no  | 3,19 | 1,29E-04 |
| CCNA_02616 | CC_2533 | 4-hydroxyphenylpyruvate dioxygenase                          | no  | 3,15 | 9,21E-06 |
| CCNA_02355 | CC_2272 | endonuclease III                                             | yes | 3,15 | 7,43E-04 |
| CCNA_01519 | CC_1452 | universal stress protein family                              | no  | 3,12 | 1,53E-05 |
| CCNA_02004 | CC_1927 | SOS-induced inhibitor of cell division SidA                  | yes | 3,09 | 8,46E-06 |
| CCNA_02974 | CC_2880 | toxin protein relE-3                                         | yes | 3,06 | 4,11E-05 |
| CCNA_03537 | CC_3424 | glyoxalase family protein                                    | yes | 3,06 | 6,38E-06 |
| CCNA_01468 | CC_1402 | cytochrome cbb3 oxidase, cytochrome c subunit ccoO           | no  | 3,02 | 2,29E-03 |
| CCNA_01600 | CC_1531 | Methane oxygenase, PmoA family                               | yes | 3,00 | 1,33E-05 |
| CCNA_01470 | CC_1404 | cytochrome cbb3 oxidase, diheme subunit, membrane-bound ccoP | no  | 2,96 | 7,92E-04 |
| CCNA_03981 | -       | hypothetical protein                                         | no  | 2,94 | 1,41E-03 |
| CCNA_03372 | CC_3263 | bacterioferritin-associated ferredoxin                       | no  | 2,94 | 1,25E-03 |
| CCNA_03931 | -       | hypothetical protein                                         | no  | 2,89 | 5,79E-03 |
| CCNA_03319 | CC_3213 | conserved hypothetical protein                               | yes | 2,88 | 2,25E-03 |
| CCNA_00801 | CC_0763 | cytochrome bd-type quinol oxidase, subunit 2 cydB            | no  | 2,85 | 1,38E-04 |
| CCNA_02433 | CC_2348 | hypothetical protein                                         | no  | 2,84 | 2,17E-03 |
| CCNA_01582 | CC_1514 | Glutathione-dependent formaldehyde-activating enzyme         | no  | 2,80 | 2,52E-03 |
| CCNA_00593 | CC_0558 | conserved hypothetical protein                               | no  | 2,77 | 1,69E-04 |
| CCNA_02614 | CC_2531 | fumarylacetoacetase superfamily protein                      | no  | 2,75 | 2,60E-04 |
| CCNA_03207 | CC_3109 | conserved hypothetical protein                               | no  | 2,73 | 4,41E-03 |
| CCNA_02727 | CC_2644 | phosphate starvation-inducible protein PhoH                  | no  | 2,73 | 2,09E-03 |
| CCNA_00719 | CC_0683 | type I secretion adaptor protein hlyD                        | no  | 2,72 | 2,19E-03 |
| CCNA_02417 | CC_2332 | biotin synthase related domain containing protein            | yes | 2,72 | 2,89E-04 |
| CCNA_03156 | CC_3060 | putative periplasmic protein                                 | no  | 2,70 | 1,38E-02 |
| CCNA_03629 | CC_3514 | DNA replication inhibitor toxin SocB                         | no  | 2,64 | 6,34E-05 |
| CCNA_00594 | CC_0559 | conserved hypothetical protein                               | no  | 2,64 | 2,23E-03 |
| CCNA_02973 | CC_2879 | antitoxin protein relB-3                                     | yes | 2,63 | 6,91E-04 |
| CCNA_02200 | CC_2115 | cytochrome c-family protein                                  | no  | 2,62 | 8,81E-04 |
| CCNA_02375 | CC_2292 | hypothetical protein                                         | no  | 2,55 | 4,84E-03 |

|            |         |                                                                                                                                   |     |      |          |
|------------|---------|-----------------------------------------------------------------------------------------------------------------------------------|-----|------|----------|
| CCNA_03023 | CC_2928 | TonB-dependent receptor                                                                                                           | no  | 2,54 | 4,09E-03 |
| CCNA_03955 | -       | hypothetical protein                                                                                                              | no  | 2,53 | 1,65E-03 |
| CCNA_00426 | CC_0421 | very-short-patch-repair endonuclease                                                                                              | no  | 2,52 | 4,55E-03 |
| CCNA_01149 | CC_1093 | TonB-dependent outer membrane receptor                                                                                            | no  | 2,48 | 2,19E-03 |
| CCNA_01471 | CC_1405 | polyferredoxin protein fixG                                                                                                       | no  | 2,46 | 2,02E-02 |
| CCNA_01141 | CC_1087 | RecA protein                                                                                                                      | yes | 2,46 | 2,58E-04 |
| CCNA_01766 | CC_1695 | CsgG-related curli protein                                                                                                        | no  | 2,44 | 4,66E-04 |
| CCNA_02613 | CC_2530 | Rieske (2Fe-2S) domain protein                                                                                                    | no  | 2,44 | 4,37E-03 |
| CCNA_00386 | CC_0382 | DNA-3-methyladenine glycosylase                                                                                                   | yes | 2,43 | 1,65E-03 |
| CCNA_00766 | CC_0729 | cobalamin adenosyltransferase family protein                                                                                      | no  | 2,41 | 1,31E-03 |
| CCNA_01107 | -       | toxin protein parE-2                                                                                                              | no  | 2,39 | 6,81E-03 |
| CCNA_00854 | CC_0811 | metallo-beta-lactamase protein                                                                                                    | no  | 2,35 | 5,26E-02 |
| CCNA_03245 | CC_3143 | beta alanine-pyruvate transaminase                                                                                                | no  | 2,34 | 1,15E-02 |
| CCNA_01106 | CC_1054 | antitoxin protein parD-2                                                                                                          | yes | 2,33 | 5,26E-02 |
| CCNA_03660 | -       | Usg protein                                                                                                                       | no  | 2,31 | 5,43E-03 |
| CCNA_02617 | CC_2534 | histidinol-phosphate aminotransferase                                                                                             | no  | 2,27 | 1,84E-02 |
| CCNA_03141 | CC_3046 | phosphoserine phosphatase                                                                                                         | no  | 2,27 | 1,75E-02 |
| CCNA_03930 | -       | hypothetical protein                                                                                                              | no  | 2,26 | 5,43E-03 |
| CCNA_03633 | CC_3518 | GIY-YIG domain protein                                                                                                            | yes | 2,24 | 1,75E-02 |
| CCNA_00853 | CC_0810 | 3-isopropylmalate dehydrogenase                                                                                                   | no  | 2,22 | 2,72E-02 |
| CCNA_00745 | CC_0708 | conserved hypothetical protein                                                                                                    | no  | 2,21 | 4,15E-02 |
| CCNA_R0180 | -       | small non-coding RNA                                                                                                              | no  | 2,20 | 1,02E-01 |
| CCNA_00767 | CC_0730 | conserved hypothetical protein                                                                                                    | no  | 2,20 | 1,12E-02 |
| CCNA_01599 | CC_1530 | conserved hypothetical protein                                                                                                    | no  | 2,20 | 5,66E-02 |
| CCNA_R0100 | -       | small non-coding RNA                                                                                                              | no  | 2,17 | 1,17E-01 |
| CCNA_00720 | CC_0684 | type I protein secretion ATP-binding protein/type I protein secretion transmembrane subunit/type I secretion processing peptidase | no  | 2,13 | 3,04E-02 |
| CCNA_01708 | CC_1636 | conserved hypothetical protein                                                                                                    | no  | 2,10 | 5,92E-02 |
| CCNA_R0051 | -       | small non-coding RNA                                                                                                              | no  | 2,10 | 1,37E-01 |
| CCNA_03630 | CC_3515 | antitoxin protein SocA                                                                                                            | yes | 2,09 | 4,37E-03 |
| CCNA_02283 | CC_2200 | HNH endonuclease family protein                                                                                                   | no  | 2,07 | 1,25E-02 |
| CCNA_03965 | -       | hypothetical protein                                                                                                              | no  | 2,06 | 1,51E-01 |
| CCNA_03343 | CC_3235 | FtsW related protein                                                                                                              | no  | 2,06 | 1,42E-02 |
| CCNA_03886 | -       | trypsin-like peptidase domain family protein                                                                                      | no  | 2,05 | 7,31E-02 |
| CCNA_03242 | CC_3140 | succinic semialdehyde dehydrogenase                                                                                               | no  | 2,03 | 2,44E-02 |
| CCNA_02779 | CC_2696 | LysM family peptidoglycan binding protein                                                                                         | no  | 2,03 | 1,06E-02 |
| CCNA_03982 | -       | hypothetical protein                                                                                                              | no  | 2,03 | 2,02E-02 |
| CCNA_R0132 | -       | small non-coding RNA                                                                                                              | no  | 2,03 | 1,57E-01 |
| CCNA_02831 | CC_2745 | conserved hypothetical protein                                                                                                    | no  | 2,01 | 9,50E-03 |
| CCNA_00106 | CC_0107 | 2-polyprenyl-6-methoxyphenol hydroxylase                                                                                          | no  | 2,01 | 2,57E-02 |
| CCNA_03232 | CC_3131 | toxin protein relE-4                                                                                                              | no  | 2,01 | 1,77E-02 |
| CCNA_03231 | -       | anti-toxin protein relB-4                                                                                                         | no  | 2,00 | 1,13E-02 |
| CCNA_00930 | CC_0886 | riboflavin synthase alpha chain                                                                                                   | no  | 2,00 | 3,89E-02 |
| CCNA_00802 | -       | cyd operon protein YbgT                                                                                                           | no  | 1,98 | 4,60E-02 |
| CCNA_00138 | CC_0139 | TonB-dependent receptor                                                                                                           | no  | 1,98 | 2,23E-02 |
| CCNA_01981 | CC_1904 | DNA translocation competence protein ComA                                                                                         | no  | 1,97 | 4,43E-02 |



|            |         |                                                                       |     |      |          |
|------------|---------|-----------------------------------------------------------------------|-----|------|----------|
| CCNA_01979 | CC_1902 | LexA repressor                                                        | yes | 1,97 | 5,82E-02 |
| CCNA_01016 | CC_0965 | copper resistance protein B                                           | no  | 1,97 | 5,64E-02 |
| CCNA_03929 | -       | hypothetical protein                                                  | no  | 1,96 | 5,54E-02 |
| CCNA_00592 | CC_0557 | ferritin superfamily protein                                          | no  | 1,94 | 3,03E-02 |
| CCNA_R0004 | -       | cell cycle regulated sRNA                                             | no  | 1,93 | 1,79E-01 |
| CCNA_03962 | -       | hypothetical protein                                                  | no  | 1,92 | 1,72E-01 |
| CCNA_02312 | CC_2229 | TraB superfamily protein                                              | no  | 1,91 | 1,42E-02 |
| CCNA_03313 | CC_3207 | hypothetical protein                                                  | no  | 1,91 | 1,11E-01 |
| CCNA_03342 | CC_3234 | short-chain acyl-CoA hydrolase                                        | no  | 1,90 | 4,36E-02 |
| CCNA_00967 | CC_0919 | TetR-family transcriptional regulator                                 | no  | 1,89 | 9,31E-02 |
| CCNA_00932 | CC_0888 | 6,7-dimethyl-8-ribityllumazine synthase                               | no  | 1,88 | 1,15E-01 |
| CCNA_01848 | CC_1770 | quinol cytochrome oxidase polypeptide IV                              | no  | 1,87 | 5,92E-02 |
| CCNA_01847 | CC_1769 | cytochrome c oxidase assembly protein Surf1                           | no  | 1,87 | 3,68E-02 |
| CCNA_00931 | CC_0887 | GTP cyclohydrolase II/3,4-dihydroxy-2-butanone-4-phosphate synthase   | no  | 1,86 | 1,84E-02 |
| CCNA_02554 | CC_2469 | conserved hypothetical protein                                        | no  | 1,84 | 7,31E-02 |
| CCNA_03986 | -       | hypothetical protein                                                  | no  | 1,84 | 6,88E-02 |
| CCNA_R0063 | -       | minimal medium expressed sRNA                                         | no  | 1,82 | 1,97E-01 |
| CCNA_03580 | CC_3467 | conserved hypothetical protein                                        | yes | 1,81 | 1,04E-01 |
| CCNA_00622 | -       | hypothetical protein                                                  | no  | 1,81 | 6,30E-02 |
| CCNA_01409 | CC_1347 | delta-aminolevulinic acid dehydratase                                 | no  | 1,81 | 2,54E-02 |
| CCNA_03695 | CC_3580 | aldehyde dehydrogenase                                                | no  | 1,80 | 6,30E-02 |
| CCNA_03346 | CC_3238 | crossover junction endodeoxyribonuclease ruvC                         | yes | 1,80 | 7,31E-02 |
| CCNA_01491 | CC_1424 | cystathionine beta-lyase                                              | no  | 1,80 | 5,09E-02 |
| CCNA_R0046 | -       | tRNA                                                                  | no  | 1,79 | 2,34E-01 |
| CCNA_03928 | -       | hypothetical protein                                                  | no  | 1,78 | 8,78E-02 |
| CCNA_03243 | CC_3141 | NADP+-dependent gamma-glutamyl-gamma-aminobutyraldehyde dehydrogenase | no  | 1,78 | 6,55E-02 |
| CCNA_R0054 | -       | tRNA                                                                  | no  | 1,78 | 2,30E-01 |
| CCNA_01492 | CC_1425 | 3-mercaptopyruvate sulfurtransferase                                  | no  | 1,76 | 7,21E-02 |
| CCNA_02812 | CC_2727 | glutaredoxin                                                          | no  | 1,76 | 1,64E-01 |
| CCNA_00613 | CC_0577 | cyanophycinase                                                        | no  | 1,75 | 9,81E-02 |
| CCNA_00029 | CC_0029 | lysine exporter protein                                               | no  | 1,75 | 8,60E-02 |
| CCNA_01849 | CC_1771 | quinol cytochrome oxidase polypeptide III                             | no  | 1,75 | 1,28E-01 |
| CCNA_01610 | CC_1541 | 2-isopropylmalate synthase                                            | no  | 1,74 | 5,92E-02 |
| CCNA_02397 | CC_2312 | DeoR-family transcriptional regulator                                 | no  | 1,74 | 1,51E-01 |
| CCNA_R0027 | -       | tRNA                                                                  | no  | 1,74 | 2,41E-01 |
| CCNA_01457 | CC_1391 | hypothetical protein                                                  | no  | 1,74 | 1,67E-01 |
| CCNA_03815 | CC_3701 | GumN superfamily protein                                              | no  | 1,73 | 6,03E-02 |

## Supplementary Table S2 - Oligonucleotides

| Oligo ID | Sequence 5' to 3'                                                         | description                                          |
|----------|---------------------------------------------------------------------------|------------------------------------------------------|
| KFO-0026 | GTTTTGGATCCTCTAGAAGTAAAGGTGAAGAAGTGTTC                                    | construction of plasmid pKF308-1                     |
| KFO-0028 | GTTTTTGAGCTCTTATTGTAGAGTTCATCCATG                                         | construction of plasmid pKF308-1                     |
| KFO-0029 | GTTTTTCTCGAGGGGCTGTAAGGACCACTT                                            | construction of plasmid pKF310-3                     |
| KFO-0035 | GTTTTTCTAGACGCAGCGTTGGCGGACA                                              | construction of plasmid pKF310-3                     |
| KFO-0056 | AAGCTTGATATCGAATTCCTGCA                                                   | amplification of pBVMCS-6/pBXMCS-6                   |
| KFO-0059 | CGAATTCGTGGATCCAGATATC                                                    | amplification of pNPTS138                            |
| KFO-0060 | CTTCGGCCGTGACGCGTCT                                                       | amplification of pNPTS138                            |
| KFO-0065 | GATATCTGGATCCACGAATTCGAACAGCGCTTCGCCCTCG                                  | construction of plasmid pKF323-3                     |
| KFO-0066 | ACGCGGGGCTTCGTCGTTTTCGGTACCCATCGTC                                        | construction of plasmid pKF323-3                     |
| KFO-0067 | GACGATGGGTACCGAAACCAGACGAAGGCCCGCGT                                       | construction of plasmid pKF323-3                     |
| KFO-0068 | AGACGCGTCACGGCCGAAGTGATGAGCTTGCCGCTGTTG                                   | construction of plasmid pKF323-3                     |
| KFO-0069 | GATATCTGGATCCACGAATTCGCGACGACATGGGCCTGGT                                  | construction of plasmid pKF416-15                    |
| KFO-0072 | AGACGCGTCACGGCCGAAGCGCTCATAGTCGAGCCTGG                                    | construction of plasmid pKF416-15                    |
| KFO-0113 | CAGGGGGACTTAACGACCGAGTTC                                                  | oligo probe for 5S ribosomal RNA                     |
| KFO-0144 | GGATCCAATCTTGATCGTAAT                                                     | amplification of pBVMCS-6                            |
| KFO-0221 | ATGGCCCTCCGGAGACTTG                                                       | oligo probe for ChvR RNA                             |
| KFO-0222 | ATGGGCTCCGCCGAAGAG                                                        | oligo probe for CCNA_R0004 RNA                       |
| KFO-0227 | GTTTTCTGCAGTCTCGAAGAACAGCGGATTC                                           | construction of plasmid pKF370-1                     |
| KFO-0230 | GTTTTCTAGAGGTCAGGGAAAGCAGTG                                               | construction of plasmid pKF370-1; pKF382-1           |
| KFO-0231 | P-GGCGGGGCTACATGTCG                                                       | construction of plasmid pKF382-1                     |
| KFO-0252 | GATATCTGGATCCACGAATTCGATGGCCAAGCTGAACTATGTG                               | construction of plasmid pKF379-1                     |
| KFO-0253 | GGCCGAGACGCCCGCTCAACCACTCTGTGGCGAGACCAT                                   | construction of plasmid pKF379-1                     |
| KFO-0254 | ATGGTCTCGCCACAGAGTGGTTGGAGCGGGCGTCTCGGCC                                  | construction of plasmid pKF379-1                     |
| KFO-0255 | AGACGCGTCACGGCCGAAGTTCAGCCAGATCGGCCGCA                                    | construction of plasmid pKF379-1                     |
| KFO-0277 | GTTCTTCGAGATTTTCAGGCTAGCTGCAGCCCGGGGG                                     | construction of plasmid pKF383-7                     |
| KFO-0278 | ATAAAGCTGACCCTATGCATATTAATTAAGGCGCCTGC                                    | construction of plasmid pKF384-1                     |
| KFO-0282 | CCCGGCTGCAGCTAGCCTGAAATCTCGAAGAACAGCGGA                                   | construction of plasmid pKF383-7                     |
| KFO-0283 | ATGCGTTTTCTGCATCGTGGAGCTCAGGCCCGCCGCGGCCAA                                | construction of plasmid pKF383-7                     |
| KFO-0286 | GCGCTTCAGACGCTCGAGTTATTTTTGACACCAGACCAAC                                  | construction of plasmid pKF383-7                     |
| KFO-0287 | GTTGGTCTGGTGTCAAAAATAACTCGAGCGTCTGAAGCGC                                  | construction of plasmid pKF383-7                     |
| KFO-0289 | GATGCGAGGAAACGCATATGCCCGTGTTTTACAACGTCCG                                  | construction of plasmid pKF383-7                     |
| KFO-0313 | GAGTACGAGAAGAACGACGAAG                                                    | amplification of <i>chvT</i> for qRT PCR             |
| KFO-0314 | CTGATCAGGATGTTGTCCAGAA                                                    | amplification of <i>chvT</i> for qRT PCR             |
| KFO-0315 | TCCAGACCTACCAGTCTTCCAC                                                    | amplification of <i>rsaA</i> for qRT PCR             |
| KFO-0316 | CCTGAGCGAACTTCGAGTAGTA                                                    | amplification of <i>rsaA</i> for qRT PCR             |
| KFO-0317 | GCGGACTTTTCGGTCTAC                                                        | amplification of <i>recF</i> for qRT PCR             |
| KFO-0318 | TGATGGCTTCGAGGAGATTG                                                      | amplification of <i>recF</i> for qRT PCR             |
| KFO-0319 | GAGCAGCTCTATGCGATCAA                                                      | amplification of <i>rpoD</i> for qRT PCR             |
| KFO-0320 | GTTCAGCTCCGATCCGAAATA                                                     | amplification of <i>rpoD</i> for qRT PCR             |
| KFO-0321 | CTTTTTAGATCTATGGTACCGTGAGCAAGGGCGAGGAG                                    | construction of plasmid pKF384-1                     |
| KFO-0323 | GTTTTTAGATCTGAATTCGCTATAGAGCAAACGTCATACG                                  | construction of plasmid pKF384-1                     |
| KFO-0326 | CTTTTGAATTCGAGGAATGGCCCTTTTGC                                             | construction of plasmid pKF386-1                     |
| KFO-0327 | CTTTTGGTACCTCCCAGCATCGTCGTCGC                                             | construction of plasmid pKF386-1; pKF397-4; pKF402-1 |
| KFO-0331 | GTTTTTCATATGAGGCATGGTTCGACAGCAGC                                          | construction of plasmid pKF384-1                     |
| KFO-0336 | ACTACAAGGACCACGACATCGACTACAAGGACGACGACGACAA<br>GTAGTAAGCCGAGACCTTCGGGTCAA | construction of plasmid pKF436-1                     |
| KFO-0337 | TTGTAGTCGATGTCGTGGTCTTGTAGTCGCCGTCGTGGTCTT<br>GTAGTCCATCTTGTAGTTGAAGCCGAG | construction of plasmid pKF436-1                     |
| KFO-0338 | GATATCTGGATCCACGAATTCGATCGACTTCCAGTTCCTGTACC                              | construction of plasmid pKF436-1                     |
| KFO-0339 | AGACGCGTCACGGCCGAAGTGTGAGGACGAGATCGCCG                                    | construction of plasmid pKF436-1                     |
| KFO-0345 | GATATCTGGATCCACGAATTCGTGTAGAGATCGGCCGGCTG                                 | construction of plasmid pKF389-6                     |
| KFO-0346 | GCGGTCTTGATACGCCGTCATCGGGTTCGATACGTGTCC                                   | construction of plasmid pKF389-6                     |
| KFO-0347 | GGACACGTATCGACCCGATGACGGGCGTATCAAGACCGC                                   | construction of plasmid pKF389-6                     |
| KFO-0348 | AGACGCGTCACGGCCGAAGTTCCTCCGGCAGACGCTAG                                    | construction of plasmid pKF389-6                     |
| KFO-0349 | CTTAGCTAGCATGCCCTACCCGCTCCG                                               | construction of plasmid pKF390-14                    |
| KFO-0350 | CTTAGCATATGTCCTTGTATCTCAAACGGGATC                                         | construction of plasmid pKF390-14                    |
| KFO-0354 | TCCGGAGGCCCATTCGAGGCGGGGCC                                                | construction of plasmid pKF395-1                     |
| KFO-0355 | CTCGGAATGGCCCTCCGAGACTTGCGC                                               | construction of plasmid pKF395-1                     |
| KFO-0372 | CTTTTGAATTCGAGGAATGGCCCTTTTGTCTCCCGCGC                                    | construction of plasmid pKF397-4                     |
| KFO-0382 | CTTTTGAATTCCTTTGCTCCCGCGCGCGC                                             | construction of plasmid pKF402-1                     |
| KFO-0417 | CCAGCGTCGTCATTGGAGCGGGCGTCTC                                              | construction of plasmid pKF414-1; pKF418-1           |
| KFO-0418 | TCCAATGACGACGCTGGAGCGGGCCC                                                | construction of plasmid pKF414-1; pKF418-1           |
| KFO-0426 | ACTTTTGACGACAACAAAACATGGCGTTG                                             | construction of plasmid pKF420; pKF466-1             |

|          |                               |                                             |
|----------|-------------------------------|---------------------------------------------|
| KFO-0427 | TTGTTGTCGTCAAAGTACGCGCGCCC    | construction of plasmid pKF420;<br>pKF466-1 |
| KFO-0476 | TGTCAGGGGAGGCTCCGCG           | oligo probe for CCNA_R0180 RNA              |
| KFO-0477 | GTCACGACTTGCGACCGCG           | oligo probe for CCNA_R0051 RNA              |
| KFO-0480 | TGTAGTCCGGCCAGGCTG            | oligo probe for CCNA_R0158 RNA              |
| KFO-0481 | GGCAGGGTGGCGCTAAGC            | oligo probe for CCNA_R0155 RNA              |
| KFO-0482 | TGGGCACATGAGCGCGAG            | oligo probe for CCNA_R0063 RNA              |
| KFO-0483 | CTTTTGAATTCTGCTCCCATGCGGCCAC  | construction of plasmid pKF385-2            |
| KFO-0484 | CTTTTGGTACCGCGTTGGTGTACGCAGTC | construction of plasmid pKF385-2            |
| KFO-0503 | AGGCGGCCTGAGATCGCG            | oligo probe for CCNA_R0132 RNA              |
| KFO-0504 | ACAGGTCGGACGGGGCG             | oligo probe for CCNA_R0097 RNA              |
| KFO-0512 | GGCCCCGCCTCGGAATG             | oligo probe for ChvR RNA (all<br>variants)  |
| KFO-0579 | GGGCCAGTTCATTAGGGAGG          | oligo probe for CCNA_R0014 RNA              |

## Supplementary Table S3 - Plasmids

| trivial name          | plasmid ID | description                                                                                                                                                                                                          | backbone/marker | reference                |
|-----------------------|------------|----------------------------------------------------------------------------------------------------------------------------------------------------------------------------------------------------------------------|-----------------|--------------------------|
| pctrl.                | pBVMCS-6   | empty vector                                                                                                                                                                                                         | pBVMCS-6/CmR    | (2)                      |
|                       | pBXMCS-6   | empty vector                                                                                                                                                                                                         | pBXMCS-6/CmR    | (2)                      |
|                       | pGFPC-2    | empty vector                                                                                                                                                                                                         | pGFPC-2 /KanR   | (2)                      |
|                       | pNPTS138   | empty vector                                                                                                                                                                                                         | pNPTS138/KanR   | M. R. Alley, unpublished |
|                       | pPR9TT     | empty vector                                                                                                                                                                                                         | pPR9TT/AmpR,CmR | (3)                      |
|                       | pRL27      | Transposon delivery vector                                                                                                                                                                                           | pRL27/KanR      | (4)                      |
|                       | pVGFP-5    | empty vector                                                                                                                                                                                                         | pVGFP-5 /TetR   | (2)                      |
|                       | pXGFP-5    | empty vector                                                                                                                                                                                                         | pXGFP-5 /TetR   | (2)                      |
|                       | pXG10sf    | empty vector                                                                                                                                                                                                         | pXG10sf/CmR     | (5)                      |
| pP <i>bapE::gfp</i>   | pKF310-3   | expression of <i>bapE::gfp</i> fusion (up to the 10th codon of <i>bapE</i> ) under control of the <i>bapE</i> promoter                                                                                               | pPR9TT/AmpR,CmR | this study               |
|                       | pKF323-2   | allelic replacement of <i>vanAB</i>                                                                                                                                                                                  | pNPTS138/KanR   | this study               |
|                       | pKF370-1   | expression of <i>chvR</i> under control of the native promoter                                                                                                                                                       | pBXMCS-6/CmR    | this study               |
|                       | pKF379-1   | allelic replacement of <i>chvR</i>                                                                                                                                                                                   | pNPTS138/KanR   | this study               |
| pVan-ChvR             | pKF382-1   | expression of ChvR under control of the <i>van</i> promoter                                                                                                                                                          | pBVMCS-6/CmR    | this study               |
| pP <i>chvR::lacZ</i>  | pKF383-7   | expression of <i>chvR::lacZ</i> transcriptional fusion (-109 to +9 of <i>chvR</i> relative to TSS); integration into <i>xyl</i> locus                                                                                | pXGFP-5 /TetR   | this study               |
|                       | pKF384-1   | empty vector                                                                                                                                                                                                         | pGFPC-2 /KanR   | this study               |
| <i>rsaA::gfp</i>      | pKF385-2   | expression of <i>rsaA::gfp</i> translational fusion (up to +45 of <i>rsaA</i> relative to the translational start site) under control of the <i>rsaA</i> promoter; integration into <i>rsaA</i> locus                | pGFPC-2 /KanR   | this study               |
| <i>chvT::gfp</i>      | pKF386-1   | expression of <i>chvT::gfp</i> translational fusion (-72 to +45 of <i>chvT</i> relative to the translational start site) under control of the <i>rsaA</i> promoter; integration into <i>rsaA</i> locus               | pGFPC-2 /KanR   | this study               |
|                       | pKF389-6   | allelic replacement of <i>chvIG-hprK</i>                                                                                                                                                                             | pNPTS138/KanR   | this study               |
| p <i>chvIG-hprK</i>   | pKF390-14  | expression of <i>chvIG-hprK</i> operon under control of the native promoter; integration into <i>xyl</i> locus                                                                                                       | pXGFP-5 /TetR   | this study               |
| ChvR-M1               | pKF395-1   | expression of ChvR-M1 (SNE G35C relative to TSS) under control of the <i>van</i> promoter                                                                                                                            | pBVMCS-6/CmR    | this study               |
| <i>chvT-M1::gfp</i>   | pKF397-4   | expression of <i>chvT-M1::gfp</i> translational fusion (-72 to +45 of <i>chvT</i> relative to the translational start site) under control of the <i>rsaA</i> promoter; SNE C-63G; integration into <i>rsaA</i> locus | pGFPC-2 /KanR   | this study               |
| <i>chvT-del5::gfp</i> | pKF402-1   | expression of <i>chvT-del5::gfp</i> translational fusion (-58 to +45 of <i>chvT</i> relative to the translational start site) under control of the <i>rsaA</i> promoter; integration into <i>rsaA</i> locus          | pGFPC-2 /KanR   | this study               |
| ChvR-M2               | pKF414-1   | expression of ChvR-M2 (SNE C66G relative to TSS) under control of the <i>van</i> promoter                                                                                                                            | pBVMCS-6/CmR    | this study               |
|                       | pKF416-15  | chromosomal integration of 3XFLAG at <i>hfq</i> N-terminus via allelic replacement                                                                                                                                   | pNPTS138/KanR   | this study               |

|                       |          |                                                                                                                                                                                                                                  |               |            |
|-----------------------|----------|----------------------------------------------------------------------------------------------------------------------------------------------------------------------------------------------------------------------------------|---------------|------------|
| ChvR-M1M2             | pKF418-1 | expression of ChvR-M1M2 (SNE G35C and C66G relative to TSS) under control of the <i>van</i> promoter                                                                                                                             | pBVMCS-6/CmR  | this study |
| <i>chvT-M2::gfp</i>   | pKF420-1 | expression of <i>chvT-M2::gfp</i> translational fusion (-72 to +45 of <i>chvT</i> relative to the translational start site) under control of the <i>rsaA</i> promoter; SNE G-13C; integration into <i>rsaA</i> locus             | pGFPC-2 /KanR | this study |
|                       | pKF436-1 | chromosomal integration of 3XFLAG at <i>chvT</i> C-terminus via allelic replacement                                                                                                                                              | pNPTS138/KanR | this study |
| <i>chvT-M1M2::gfp</i> | pKF466-1 | expression of <i>chvT-M1M2::gfp</i> translational fusion (-72 to +45 of <i>chvT</i> relative to the translational start site) under control of the <i>rsaA</i> promoter; SNE C-63G and G-13C; integration into <i>rsaA</i> locus | pGFPC-2 /KanR | this study |

**Supplementary Table S4 - Strains**

| Strain                                         | Stock name | Bacterium                           | Genotype/relevant markers                                | Source/reference                            |
|------------------------------------------------|------------|-------------------------------------|----------------------------------------------------------|---------------------------------------------|
| wild-type                                      | KFS-0006   | <i>C. crescentus</i> NA1000         |                                                          | laboratory stock                            |
| $\Delta vanAB$                                 | KFS-0058   | <i>C. crescentus</i> NA1000         | $\Delta vanAB$                                           | this study                                  |
|                                                | KFS-0143   | <i>C. crescentus</i> NA1000         | $\Delta lacA$                                            | JOE2321; (6)                                |
| $\Delta chvR$                                  | KFS-0150   | <i>C. crescentus</i> NA1000         | $\Delta chvR$                                            | this study                                  |
| $\Delta lacA$                                  | KFS-0172   | <i>C. crescentus</i> NA1000         | $\Delta lacA$ <i>xylX::pKF383</i>                        | this study                                  |
| $\Delta lacA$ <i>chvI::Tn5</i>                 | KFS-0174   | <i>C. crescentus</i> NA1000         | $\Delta lacA$ <i>xylX::pKF383</i> <i>chvI::Tn5(tetR)</i> | this study                                  |
|                                                | KFS-0179   | <i>C. crescentus</i> NA1000         | $\Delta vanAB$ <i>PrsaA::pKF386-1</i>                    | this study                                  |
| $\Delta chvIG-hprK$                            | KFS-0185   | <i>C. crescentus</i> NA1000         | $\Delta chvIG-hprK$                                      | this study                                  |
| $\Delta chvIG-hprK$ (complemented)             | KFS-0189   | <i>C. crescentus</i> NA1000         | $\Delta chvIG-hprK$ <i>xylX::pKF390-14</i>               | this study                                  |
|                                                | KFS-0297   | <i>C. crescentus</i> NA1000         | <i>3XFLAG::hfq</i>                                       | UJ10248; Jenal laboratory, Basel University |
|                                                | KFS-0316   | <i>C. crescentus</i> NA1000         | $\Delta vanAB$ <i>PrsaA::pKF402-1</i>                    | this study                                  |
|                                                | KFS-0334   | <i>C. crescentus</i> NA1000         | $\Delta vanAB$ <i>PrsaA::pKF420-1</i>                    | this study                                  |
| <i>3XFLAG::hfq</i>                             | KFS-0344   | <i>C. crescentus</i> NA1000         | <i>3XFLAG::hfq</i>                                       | this study                                  |
| <i>chvT::3XFLAG</i>                            | KFS-0392   | <i>C. crescentus</i> NA1000         | <i>chvT::3XFLAG</i>                                      | this study                                  |
| <i>chvT::3XFLAG</i> $\Delta chvR$              | KFS-0394   | <i>C. crescentus</i> NA1000         | <i>chvT::3XFLAG</i> $\Delta chvR$                        | this study                                  |
|                                                | KFS-0513   | <i>C. crescentus</i> NA1000         | $\Delta vanAB$ <i>PrsaA::pKF385-2</i>                    | this study                                  |
|                                                | KFS-0550   | <i>C. crescentus</i> NA1000         | $\Delta vanAB$ <i>PrsaA::pKF466-1</i>                    | this study                                  |
|                                                | KFS-0570   | <i>C. crescentus</i> NA1000         | $\Delta hfq::tet$                                        | CJWS 5477; (7)                              |
| $\Delta hfq$                                   | KFS-0796   | <i>C. crescentus</i> NA1000         | $\Delta hfq::tet$                                        | this study                                  |
| $\Delta vanAB$ $\Delta hfq$                    | KFS-0797   | <i>C. crescentus</i> NA1000         | $\Delta hfq$ $\Delta vanAB$                              | this study                                  |
|                                                | KFS-0798   | <i>C. crescentus</i> NA1000         | $\Delta hfq$ $\Delta vanAB$ <i>PrsaA::pKF386-1</i>       | this study                                  |
| <i>chvT::3XFLAG</i> $\Delta hfq$               | KFS-0911   | <i>C. crescentus</i> NA1000         | <i>chvT::3XFLAG</i> $\Delta hfq::tet$                    | this study                                  |
| <i>chvT::3XFLAG</i> $\Delta chvR$ $\Delta hfq$ | KFS-0912   | <i>C. crescentus</i> NA1000         | <i>chvT::3XFLAG</i> $\Delta chvR$ $\Delta hfq::tet$      | this study                                  |
|                                                | KFS-0013   | <i>E. coli</i> S17 -1 $\lambda$ pir |                                                          | laboratory stock                            |
|                                                | KFS-0088   | <i>E. coli</i> TOP10                |                                                          | Invitrogen                                  |



## Supplementary References

1. Schrader, J.M., Zhou, B., Li, G.W., Lasker, K., Childers, W.S., Williams, B., Long, T., Crosson, S., McAdams, H.H., Weissman, J.S. *et al.* (2014) The coding and noncoding architecture of the *Caulobacter crescentus* genome. *PLoS Genet*, **10**, e1004463.
2. Thanbichler, M., Iniesta, A.A. and Shapiro, L. (2007) A comprehensive set of plasmids for vanillate- and xylose-inducible gene expression in *Caulobacter crescentus*. *Nucleic Acids Res*, **35**, e137.
3. Santos, P.M., Di Bartolo, I., Blatny, J.M., Zennaro, E. and Valla, S. (2001) New broad-host-range promoter probe vectors based on the plasmid RK2 replicon. *FEMS Microbiol Lett*, **195**, 91-96.
4. Larsen, R.A., Wilson, M.M., Guss, A.M. and Metcalf, W.W. (2002) Genetic analysis of pigment biosynthesis in *Xanthobacter autotrophicus* Py2 using a new, highly efficient transposon mutagenesis system that is functional in a wide variety of bacteria. *Arch Microbiol*, **178**, 193-201.
5. Corcoran, C.P., Podkaminski, D., Papenfort, K., Urban, J.H., Hinton, J.C. and Vogel, J. (2012) Superfolder GFP reporters validate diverse new mRNA targets of the classic porin regulator, MicF RNA. *Mol Microbiol*, **84**, 428-445.
6. Arellano, B.H., Ortiz, J.D., Manzano, J. and Chen, J.C. (2010) Identification of a dehydrogenase required for lactose metabolism in *Caulobacter crescentus*. *Appl Environ Microbiol*, **76**, 3004-3014.
7. Irnov, I., Wang, Z., Jannetty, N.D., Bustamante, J.A., Rhee, K.Y. and Jacobs-Wagner, C. (2017) Crosstalk between the tricarboxylic acid cycle and peptidoglycan synthesis in *Caulobacter crescentus* through the homeostatic control of alpha-ketoglutarate. *PLoS Genet*, **13**, e1006978.
